# Supplementary material
Source: PubMed Central journal article supplement (PMC8177109)

## Supplementary Online Content

Cao Y, Nishihara R, Wu K, et al. Population-wide impact of long-term use of aspirin and the risk for cancer. *JAMA Oncol*. Published online March 3, 2016. doi:10.1001/jamaoncol.2015.6396.

**eMethods.** Statistical Analysis

**eTable 1.** Age-Standardized Characteristics According to Person-years of Regular Aspirin Use

**eTable 2.** Regular Aspirin Use and Risk for Other Cancer

**eTable 3.** Dose of Standard Aspirin and Risk for Cancer by Sex

**eTable 4.** Dose of Standard Aspirin (With 6- to 8-Year Lag) and Risk for Cancer

**eTable 5.** Duration of Regular Aspirin Use and Risk for Cancer by Sex

**eTable 6.** Status, Duration of Regular Aspirin Use, and Time Since Last Use and Risk for Cancer

**eTable 7.** Joint Analysis of Dose and Duration of Regular Aspirin Use and Risk for Cancer

**eTable 8.** Population-Attributable Risk (PAR) of Regular Aspirin Use

**eFigure.** Stratified Analysis of Regular Aspirin Use and Risk for Gastrointestinal and Colorectal Cancer

This supplementary material has been provided by the authors to give readers additional information about their work.

## eMethods. Statistical Analysis

At baseline, we excluded participants with cancer or who reported implausible energy intakes (<600 or >3500 kcal/d for women and <800 or >4200 kcal/d for men). Because most prostate cancer detected through prostate-specific antigen (PSA) screening is indolent, we included only advanced cases defined as regionally invasive, metastatic ( $\geq$ T3b, N1 or M1) at diagnosis, or cases that developed metastases or died from prostate cancer during follow-up.<sup>1</sup>

The covariates included in the multivariable models were established/potential risk factors for major cancers, including race, height, BMI, family history of cancer, physical exam in past 2 years, history of colonoscopy/sigmoidoscopy, pack-years of smoking, leisure-time physical activity, alcohol intake, current multivitamin use, regular use of nonsteroidal anti-inflammatory drugs, total energy intake, folate, calcium, red and processed meat intake, and adherence to Alternate Health Eating Index (AHEI)-2010.<sup>2,3</sup> Among men, we also adjusted for PSA test; among women, we also adjusted for menopause status/menopausal hormone therapy (MHT), and mammography in past 2 years.

Departures from the proportional hazards assumption was tested by likelihood ratio tests comparing models with and without the interaction terms of age or follow-up cycle by aspirin exposures. No significant violation of proportionality was found ( $P>0.05$ ). We suspended update of aspirin information after a confirmed diagnosis of gastrointestinal bleeding since this is likely to alter aspirin use.

For missing data on aspirin use, we carry forward from the previous questionnaire and conducted sensitivity analysis to compare the estimates; for missing data on covariates, we used indicator variable to represent the missing category.

As a sensitivity analysis, we evaluated the latency of aspirin dose and risk of cancer using a lag of 6-8 years. For example, in NHS, we used aspirin dose in 1980 for cases diagnosed in 1986-1988, intake in 1982 for cases diagnosed in 1988-1990, and so forth.

## eReferences

1. Wilson KM, Kasperzyk JL, Rider JR, et al. Coffee consumption and prostate cancer risk and progression in the Health Professionals Follow-up Study. *J Natl Cancer Inst.* 2011;103(11):876-884.
2. McCullough ML, Feskanich D, Stampfer MJ, et al. Diet quality and major chronic disease risk in men and women: moving toward improved dietary guidance. *Am J Clin Nutr.* 2002;76(6):1261-1271.
3. Chiuve SE, Fung TT, Rimm EB, et al. Alternative Dietary Indices Both Strongly Predict Risk of Chronic Disease. *J Nutr.* 2012;142(6):1009-1018.

**eTable 1. Age-Standardized Characteristics According to Person-years of Regular Aspirin Use**

| Characteristic                                          | NHS             |              | HPFS            |              |
|---------------------------------------------------------|-----------------|--------------|-----------------|--------------|
|                                                         | Nonregular user | Regular user | Nonregular user | Regular user |
| Age, y <sup>a</sup>                                     | 58.4(10.8)      | 62.4(11.3)   | 61.0(11.0)      | 64.8(10.3)   |
| White, %                                                | 97              | 98           | 89              | 91           |
| Family history of cancer, %                             | 38              | 38           | 25              | 28           |
| History of diabetes, %                                  | 6.0             | 7.9          | 6.0             | 7.9          |
| Hypertension, %                                         | 34              | 42           | 31              | 42           |
| Hypercholesterolemia, %                                 | 37              | 43           | 34              | 49           |
| ≥2 cardiac risk factors <sup>b</sup> , %                | 30              | 38           | 22              | 34           |
| Height, cm                                              | 164(6)          | 164(6)       | 178(7)          | 178(7)       |
| BMI, kg/m <sup>2</sup>                                  | 25.1(4.5)       | 25.5(4.7)    | 25.7(3.4)       | 26.0(3.4)    |
| Postmenopause, %                                        | 75              | 78           | -               | -            |
| Current hormone therapy use, %                          | 27              | 30           | -               | -            |
| Physical examination in past 2 y, %                     | 70              | 75           | 72              | 80           |
| History of colonoscopy/sigmoidoscopy, %                 | 35              | 39           | 46              | 55           |
| Mammogram in past 2 y, %                                | 70              | 75           | -               | -            |
| Prostate-specific antigen (PSA) test in past 2 y, %     | -               | -            | 26              | 39           |
| Current use of multivitamin, %                          | 47              | 56           | 39              | 53           |
| Regular use of NSAIDs, %                                | 29              | 28           | 13              | 17           |
| Physical activity, MET-hrs/wk                           | 16.3(18.0)      | 16.9(16.8)   | 29.2(29.4)      | 30.5(28.7)   |
| Ever smokers, %                                         | 55              | 56           | 49              | 53           |
| Pack-years among ever smokers                           | 23.5(20.0)      | 23.8(20.3)   | 24.4(19.1)      | 24.8(18.9)   |
| Total calorie intake, kcal/d                            | 1667(441)       | 1691(445)    | 1968(567)       | 1990(554)    |
| Alcohol intake, g/d                                     | 5.9(9.3)        | 6.3(9.5)     | 10.4(13.8)      | 11.7(14.1)   |
| Red and processed meat intake, servings/wk              | 6.6(3.7)        | 6.8(3.7)     | 6.5(4.6)        | 6.3(4.4)     |
| Folate intake, µg/d                                     | 409(216)        | 431(210)     | 512(255)        | 554(249)     |
| Calcium intake, mg/d                                    | 904(349)        | 932(356)     | 913(381)        | 938(366)     |
| Alternate Healthy Eating Index (AHEI) 2010 <sup>c</sup> | 46.1(9.8)       | 46.0(9.5)    | 47.7(10.3)      | 48.2(9.9)    |

<sup>a</sup>All values other than age have been directly standardized to age distribution (in 5-year age group) of all the participants. Mean (SD) was presented for continuous variables.

<sup>b</sup>Includes hypertension, hypercholesterolemia, diabetes mellitus, current smoking, and BMI≥30 kg/m<sup>2</sup>.

<sup>c</sup>Without alcohol intake.

**eTable 2. Regular Aspirin Use and Risk for Other Cancer**

|                                        | Regular user vs nonregular user |                   |                   |
|----------------------------------------|---------------------------------|-------------------|-------------------|
|                                        | Women                           | Men               | Combined          |
| <b>Endometrial</b>                     |                                 |                   |                   |
| Cases, No.                             | 616/855                         | -                 | -                 |
| Age-adjusted RR (95% CI)               | 1.02 (0.92, 1.13)               | -                 | -                 |
| Multivariable RR (95% CI) <sup>a</sup> | 0.97 (0.87, 1.08)               | -                 | -                 |
| <b>Ovarian</b>                         |                                 |                   |                   |
| Cases, No.                             | 334/452                         | -                 | -                 |
| Age-adjusted RR (95% CI)               | 1.05 (0.90, 1.21)               | -                 | -                 |
| Multivariable RR (95% CI) <sup>a</sup> | 1.05 (0.90, 1.21)               | -                 | -                 |
| <b>Kidney</b>                          |                                 |                   |                   |
| Cases, No.                             | 162/175                         | 147/152           | 309/327           |
| Age-adjusted RR (95% CI)               | 1.10 (0.88, 1.36)               | 0.96 (0.76, 1.21) | 1.03 (0.88, 1.21) |
| Multivariable RR (95% CI) <sup>a</sup> | 1.03 (0.83, 1.29)               | 0.94 (0.74, 1.19) | 0.99 (0.84, 1.16) |
| <b>Bladder</b>                         |                                 |                   |                   |
| Cases, No.                             | 222/233                         | 383/311           | 605/544           |
| Age-adjusted RR (95% CI)               | 1.17 (0.97, 1.42)               | 1.19 (1.02, 1.38) | 1.18 (1.05, 1.33) |
| Multivariable RR (95% CI) <sup>a</sup> | 1.11 (0.92, 1.35)               | 1.08 (0.92, 1.26) | 1.09 (0.97, 1.23) |
| <b>Brain</b>                           |                                 |                   |                   |
| Cases, No.                             | 57/89                           | 82/82             | 139/171           |
| Age-adjusted RR (95% CI)               | 0.96 (0.68, 1.35)               | 1.02 (0.74, 1.41) | 0.99 (0.79, 1.25) |
| Multivariable RR (95% CI) <sup>a</sup> | 0.95 (0.67, 1.34)               | 1.10 (0.79, 1.53) | 1.03 (0.81, 1.30) |
| <b>Melanoma</b>                        |                                 |                   |                   |
| Cases, No.                             | 562/608                         | 400/391           | 972/999           |
| Age-adjusted RR (95% CI)               | 0.96 (0.68, 1.35)               | 1.02 (0.88, 1.18) | 1.09 (1.00, 1.20) |
| Multivariable RR (95% CI) <sup>a</sup> | 0.95 (0.67, 1.34)               | 0.97 (0.84, 1.12) | 1.04 (0.95, 1.14) |
| <b>Non-Hodgkin's lymphoma</b>          |                                 |                   |                   |
| Cases, No.                             | 467/571                         | 343/295           | 810/866           |
| Age-adjusted RR (95% CI)               | 1.15 (1.02, 1.29)               | 1.11 (0.94, 1.30) | 1.03 (0.93, 1.14) |
| Multivariable RR (95% CI) <sup>a</sup> | 1.09 (0.96, 1.22)               | 1.07 (0.91, 1.26) | 0.99 (0.89, 1.09) |
| <b>Myeloma</b>                         |                                 |                   |                   |
| Cases, No.                             | 91/105                          | 84/91             | 175/196           |
| Age-adjusted RR (95% CI)               | 0.98 (0.87, 1.11)               | 0.86 (0.63, 1.16) | 0.97 (0.79, 1.19) |
| Multivariable RR (95% CI) <sup>a</sup> | 0.94 (0.83, 1.07)               | 0.86 (0.63, 1.17) | 0.96 (0.77, 1.18) |
| <b>Leukemia</b>                        |                                 |                   |                   |
| Cases, No.                             | 73/83                           | 119/154           | 192/237           |
| Age-adjusted RR (95% CI)               | 1.11 (0.81, 1.54)               | 0.71 (0.56, 0.91) | 0.84 (0.69, 1.02) |
| Multivariable RR (95% CI) <sup>a</sup> | 1.10 (0.80, 1.53)               | 0.70 (0.54, 0.89) | 0.82 (0.68, 1.01) |

NHS 1980-2012, HPFS 1986-2010

<sup>a</sup>Adjusted for the same variables as in Table 2.

**eTable 3. Dose of Standard Aspirin and Risk for Cancer by Sex**

|                                        | Tablets/wk   |                   |                   |                   |                   | P value for trend <sup>c</sup> |
|----------------------------------------|--------------|-------------------|-------------------|-------------------|-------------------|--------------------------------|
|                                        | 0            | 0.5-1.5           | 2-5               | 6-14              | ≥15               |                                |
| <b>Total cancer<sup>a</sup></b>        |              |                   |                   |                   |                   |                                |
| <b>Women</b>                           |              |                   |                   |                   |                   |                                |
| Cases, No. (N=20358)                   | 10129        | 2783              | 4089              | 2750              | 607               |                                |
| Person-years                           | 1158258      | 352842            | 451999            | 283483            | 78897             |                                |
| Age-adjusted RR (95% CI)               | 1[Reference] | 0.96 (0.92, 1.01) | 0.97 (0.94, 1.01) | 1.01 (0.97, 1.06) | 1.03 (0.95, 1.12) | .30                            |
| Multivariable RR (95% CI) <sup>b</sup> | 1[Reference] | 0.98 (0.94, 1.02) | 0.97 (0.93, 1.00) | 0.97 (0.93, 1.01) | 1.00 (0.92, 1.09) | .40                            |
| <b>Men</b>                             |              |                   |                   |                   |                   |                                |
| Cases, No. (N=5429)                    | 2191         | 883               | 1332              | 901               | 122               |                                |
| Person-years                           | 229903       | 104111            | 139279            | 94388             | 12858             |                                |
| Age-adjusted RR (95% CI)               | 1[Reference] | 0.94 (0.87, 1.02) | 0.96 (0.89, 1.03) | 0.92 (0.85, 0.99) | 0.96 (0.80, 1.15) | .10                            |
| Multivariable RR (95% CI) <sup>b</sup> | 1[Reference] | 0.94 (0.87, 1.02) | 0.94 (0.88, 1.01) | 0.88 (0.81, 0.95) | 0.89 (0.74, 1.07) | .003                           |
| <b>GI cancer</b>                       |              |                   |                   |                   |                   |                                |
| <b>Women</b>                           |              |                   |                   |                   |                   |                                |
| Cases, No. (N=2370)                    | 1247         | 319               | 435               | 307               | 62                |                                |
| Age-adjusted RR (95% CI)               | 1[Reference] | 0.85 (0.75, 0.97) | 0.87 (0.78, 0.97) | 0.86 (0.76, 0.98) | 0.78 (0.60, 1.01) | .02                            |
| Multivariable RR (95% CI) <sup>b</sup> | 1[Reference] | 0.87 (0.77, 0.99) | 0.88 (0.79, 0.98) | 0.83 (0.73, 0.94) | 0.76 (0.59, 0.99) | .003                           |
| <b>Men</b>                             |              |                   |                   |                   |                   |                                |
| Cases, No. (N=1357)                    | 581          | 223               | 305               | 228               | 20                |                                |
| Age-adjusted RR (95% CI)               | 1[Reference] | 0.92 (0.78, 1.07) | 0.81 (0.71, 0.94) | 0.86 (0.74, 1.01) | 0.60 (0.38, 0.94) | .009                           |
| Multivariable RR (95% CI) <sup>b</sup> | 1[Reference] | 0.91 (0.78, 1.07) | 0.82 (0.71, 0.95) | 0.82 (0.70, 0.96) | 0.56 (0.35, 0.87) | .001                           |
| <b>Non-GI cancer</b>                   |              |                   |                   |                   |                   |                                |
| <b>Women</b>                           |              |                   |                   |                   |                   |                                |
| Cases, No. (N=17988)                   | 8882         | 2464              | 3654              | 2443              | 545               |                                |
| Age-adjusted RR (95% CI)               | 1[Reference] | 0.98 (0.93, 1.02) | 0.99 (0.95, 1.03) | 1.04 (0.99, 1.08) | 1.07 (0.98, 1.17) | .05                            |
| Multivariable RR (95% CI) <sup>b</sup> | 1[Reference] | 0.99 (0.95, 1.04) | 0.98 (0.94, 1.02) | 0.99 (0.95, 1.04) | 1.03 (0.95, 1.13) | .83                            |
| <b>Men</b>                             |              |                   |                   |                   |                   |                                |
| Cases, No. (N=4072)                    | 1610         | 660               | 1027              | 673               | 102               |                                |
| Age-adjusted RR (95% CI)               | 1[Reference] | 0.95 (0.87, 1.04) | 1.01 (0.93, 1.09) | 0.94 (0.86, 1.03) | 1.09 (0.89, 1.34) | .71                            |
| Multivariable RR (95% CI) <sup>b</sup> | 1[Reference] | 0.94 (0.86, 1.04) | 0.99 (0.91, 1.07) | 0.90 (0.82, 0.98) | 1.01 (0.82, 1.24) | .13                            |

NHS 1980-2012, HPFS 1992-2010

<sup>a</sup>For prostate cancer, only advanced cases were included.

<sup>b</sup>Adjusted for the same variables as in Table 2.

<sup>c</sup>Tests for trend were conducted using the median value of each category as a continuous variable.

**eTable 4. Dose of Standard Aspirin (With 6- to 8-Year Lag) and Risk for Cancer**

|                                        | Tablets/wk   |                   |                   |                   |                   | P value for trend <sup>c</sup> |
|----------------------------------------|--------------|-------------------|-------------------|-------------------|-------------------|--------------------------------|
|                                        | 0            | 0.5-1.5           | 2-5               | 6-14              | ≥15               |                                |
| <b>Total cancer<sup>a</sup></b>        |              |                   |                   |                   |                   |                                |
| <b>Women</b>                           |              |                   |                   |                   |                   |                                |
| Cases, No. (N=14140)                   | 7032         | 2297              | 2352              | 1964              | 495               |                                |
| Person-years                           | 681338       | 240793            | 237947            | 175236            | 52388             |                                |
| Age-adjusted RR (95% CI)               | 1[Reference] | 0.97 (0.92, 1.02) | 0.98 (0.94, 1.03) | 1.01 (0.96, 1.07) | 1.01 (0.92, 1.11) | .46                            |
| Multivariable RR (95% CI) <sup>b</sup> | 1[Reference] | 0.98 (0.93, 1.03) | 0.98 (0.94, 1.03) | 0.98 (0.93, 1.03) | 0.99 (0.90, 1.08) | .60                            |
| <b>Men</b>                             |              |                   |                   |                   |                   |                                |
| Cases, No. (N=2865)                    | 1046         | 539               | 683               | 540               | 57                |                                |
| Person-years                           | 110055       | 57439             | 65750             | 52516             | 6119              |                                |
| Age-adjusted RR (95% CI)               | 1[Reference] | 1.00 (0.90, 1.11) | 1.03 (0.93, 1.13) | 0.97 (0.88, 1.08) | 0.92 (0.70, 1.20) | .41                            |
| Multivariable RR (95% CI) <sup>b</sup> | 1[Reference] | 1.00 (0.90, 1.11) | 1.02 (0.92, 1.13) | 0.92 (0.83, 1.03) | 0.86 (0.65, 1.12) | .06                            |
| <b>Combined</b>                        |              |                   |                   |                   |                   |                                |
| Cases, No. (N=17005)                   | 8078         | 2836              | 3035              | 2504              | 552               |                                |
| Person-years                           | 791393       | 298232            | 303697            | 227752            | 58507             |                                |
| Age-adjusted RR (95% CI)               | 1[Reference] | 0.97 (0.93, 1.02) | 0.99 (0.95, 1.03) | 1.00 (0.96, 1.05) | 1.00 (0.92, 1.10) | .68                            |
| Multivariable RR (95% CI) <sup>b</sup> | 1[Reference] | 0.99 (0.94, 1.03) | 0.99 (0.95, 1.04) | 0.97 (0.93, 1.02) | 0.98 (0.89, 1.07) | .28                            |
| <b>GI cancer</b>                       |              |                   |                   |                   |                   |                                |
| <b>Women</b>                           |              |                   |                   |                   |                   |                                |
| Cases, No. (N=1616)                    | 871          | 251               | 246               | 198               | 50                |                                |
| Age-adjusted RR (95% CI)               | 1[Reference] | 0.78 (0.68, 0.91) | 0.82 (0.71, 0.94) | 0.77 (0.66, 0.91) | 0.71 (0.53, 0.95) | .002                           |
| Multivariable RR (95% CI) <sup>b</sup> | 1[Reference] | 0.79 (0.68, 0.92) | 0.83 (0.72, 0.96) | 0.76 (0.65, 0.89) | 0.71 (0.53, 0.95) | .001                           |
| <b>Men</b>                             |              |                   |                   |                   |                   |                                |
| Cases, No. (N=723)                     | 279          | 136               | 174               | 124               | 10                |                                |
| Age-adjusted RR (95% CI)               | 1[Reference] | 0.95 (0.77, 1.17) | 0.97 (0.80, 1.18) | 0.83 (0.67, 1.03) | 0.60 (0.32, 1.13) | .02                            |
| Multivariable RR (95% CI) <sup>b</sup> | 1[Reference] | 0.97 (0.78, 1.19) | 0.99 (0.81, 1.21) | 0.79 (0.63, 0.98) | 0.57 (0.30, 1.08) | .006                           |
| <b>Combined</b>                        |              |                   |                   |                   |                   |                                |
| Cases, No. (N=2339)                    | 1150         | 387               | 420               | 322               | 60                |                                |
| Age-adjusted RR (95% CI)               | 1[Reference] | 0.83 (0.74, 0.94) | 0.87 (0.77, 0.97) | 0.79 (0.69, 0.89) | 0.69 (0.53, 0.90) | <.001                          |
| Multivariable RR (95% CI) <sup>b</sup> | 1[Reference] | 0.85 (0.75, 0.95) | 0.88 (0.79, 0.99) | 0.77 (0.68, 0.87) | 0.69 (0.53, 0.90) | <.001                          |
| <b>Non-GI cancer</b>                   |              |                   |                   |                   |                   |                                |
| <b>Women</b>                           |              |                   |                   |                   |                   |                                |
| Cases, No. (N=12524)                   | 6161         | 2046              | 2106              | 1766              | 445               |                                |
| Age-adjusted RR (95% CI)               | 1[Reference] | 1.00 (0.95, 1.05) | 1.01 (0.96, 1.06) | 1.05 (0.99, 1.11) | 1.06 (0.96, 1.17) | .05                            |
| Multivariable RR (95% CI) <sup>b</sup> | 1[Reference] | 1.01 (0.96, 1.06) | 1.00 (0.96, 1.06) | 1.01 (0.96, 1.07) | 1.03 (0.93, 1.14) | .53                            |
| <b>Men</b>                             |              |                   |                   |                   |                   |                                |
| Cases, No. (N=2147)                    | 767          | 403               | 509               | 416               | 47                |                                |
| Age-adjusted RR (95% CI)               | 1[Reference] | 1.02 (0.90, 1.15) | 1.05 (0.93, 1.18) | 1.03 (0.91, 1.16) | 1.04 (0.77, 1.40) | .69                            |
| Multivariable RR (95% CI) <sup>b</sup> | 1[Reference] | 1.01 (0.89, 1.14) | 1.02 (0.91, 1.15) | 0.97 (0.86, 1.10) | 0.95 (0.70, 1.29) | .50                            |
| <b>Combined</b>                        |              |                   |                   |                   |                   |                                |

|                                        |              |                   |                   |                   |                   |     |
|----------------------------------------|--------------|-------------------|-------------------|-------------------|-------------------|-----|
| Cases, No. (N=14666)                   | 6928         | 2449              | 2615              | 2182              | 492               |     |
| Age-adjusted RR (95% CI)               | 1[Reference] | 1.00 (0.95, 1.05) | 1.01 (0.97, 1.06) | 1.04 (0.99, 1.10) | 1.06 (0.97, 1.16) | .05 |
| Multivariable RR (95% CI) <sup>b</sup> | 1[Reference] | 1.01 (0.96, 1.06) | 1.01 (0.96, 1.06) | 1.01 (0.96, 1.06) | 1.03 (0.93, 1.13) | .65 |

NHS 1986-2012, HPFS 1998-2010

<sup>a</sup>For prostate cancer, only advanced cases were included.

<sup>b</sup>Adjusted for the same variables as in Table 2.

<sup>c</sup>Tests for trend were conducted using the median value of each category as a continuous variable.



**eTable 5. Duration of Regular Aspirin Use and Risk for Cancer by Sex**

|                                        | Years of Regular Aspirin Use |                   |                   |                   |                   | P value for trend <sup>c</sup> |
|----------------------------------------|------------------------------|-------------------|-------------------|-------------------|-------------------|--------------------------------|
|                                        | 0                            | 1-5               | 6-10              | 11-15             | ≥16               |                                |
| <b>Total cancer<sup>a</sup></b>        |                              |                   |                   |                   |                   |                                |
| <b>Women</b>                           |                              |                   |                   |                   |                   |                                |
| Cases, No. (N=20335)                   | 6307                         | 3613              | 3418              | 1817              | 5180              |                                |
| Person-years                           | 861597                       | 414034            | 328019            | 175455            | 542507            |                                |
| Age-adjusted RR (95% CI)               | 1[Reference]                 | 1.04 (1.00, 1.09) | 1.06 (1.01, 1.11) | 1.05 (0.99, 1.10) | 1.00 (1.00, 1.00) | .24                            |
| Multivariable RR (95% CI) <sup>b</sup> | 1[Reference]                 | 1.01 (0.97, 1.06) | 1.02 (0.98, 1.07) | 1.01 (0.96, 1.07) | 0.96 (0.92, 1.00) | .01                            |
| <b>Men</b>                             |                              |                   |                   |                   |                   |                                |
| Cases, No. (N=7571)                    | 2432                         | 1509              | 1772              | 830               | 1028              |                                |
| Person-years                           | 343395                       | 184589            | 196551            | 82600             | 98958             |                                |
| Age-adjusted RR (95% CI)               | 1[Reference]                 | 0.97 (0.91, 1.04) | 0.94 (0.88, 1.00) | 0.95 (0.87, 1.03) | 0.95 (0.88, 1.03) | .13                            |
| Multivariable RR (95% CI) <sup>b</sup> | 1[Reference]                 | 0.95 (0.89, 1.02) | 0.91 (0.85, 0.97) | 0.90 (0.83, 0.98) | 0.90 (0.83, 0.98) | .003                           |
| <b>GI cancer</b>                       |                              |                   |                   |                   |                   |                                |
| <b>Women</b>                           |                              |                   |                   |                   |                   |                                |
| Cases, No. (N=2366)                    | 840                          | 449               | 379               | 189               | 509               |                                |
| Age-adjusted RR (95% CI)               | 1[Reference]                 | 0.96 (0.85, 1.08) | 0.87 (0.77, 0.98) | 0.80 (0.68, 0.94) | 0.76 (0.67, 0.85) | <.001                          |
| Multivariable RR (95% CI) <sup>b</sup> | 1[Reference]                 | 0.95 (0.84, 1.06) | 0.86 (0.76, 0.98) | 0.80 (0.68, 0.94) | 0.76 (0.67, 0.85) | <.001                          |
| <b>Men</b>                             |                              |                   |                   |                   |                   |                                |
| Cases, No. (N=1917)                    | 655                          | 386               | 436               | 194               | 246               |                                |
| Age-adjusted RR (95% CI)               | 1[Reference]                 | 0.92 (0.81, 1.04) | 0.83 (0.74, 0.95) | 0.78 (0.66, 0.93) | 0.80 (0.68, 0.95) | .001                           |
| Multivariable RR (95% CI) <sup>b</sup> | 1[Reference]                 | 0.93 (0.82, 1.06) | 0.85 (0.74, 0.97) | 0.78 (0.66, 0.93) | 0.79 (0.66, 0.93) | .001                           |
| <b>Non-GI cancer</b>                   |                              |                   |                   |                   |                   |                                |
| <b>Women</b>                           |                              |                   |                   |                   |                   |                                |
| Cases, No. (N=17969)                   | 5467                         | 3164              | 3039              | 1628              | 4671              |                                |
| Age-adjusted RR (95% CI)               | 1[Reference]                 | 1.06 (1.01, 1.10) | 1.09 (1.04, 1.14) | 1.09 (1.03, 1.15) | 1.03 (0.99, 1.07) | .60                            |
| Multivariable RR (95% CI) <sup>b</sup> | 1[Reference]                 | 1.02 (0.98, 1.07) | 1.05 (1.00, 1.10) | 1.04 (0.98, 1.10) | 0.99 (0.95, 1.03) | .24                            |
| <b>Men</b>                             |                              |                   |                   |                   |                   |                                |
| Cases, No. (N=5654)                    | 1777                         | 1123              | 1336              | 636               | 782               |                                |
| Age-adjusted RR (95% CI)               | 1[Reference]                 | 1.00 (0.92, 1.08) | 0.98 (0.91, 1.05) | 1.02 (0.92, 1.12) | 1.01 (0.92, 1.11) | .82                            |
| Multivariable RR (95% CI) <sup>b</sup> | 1[Reference]                 | 0.96 (0.89, 1.04) | 0.93 (0.86, 1.00) | 0.95 (0.86, 1.04) | 0.94 (0.85, 1.04) | .15                            |

NHS 1986-2012, HPFS 1998-2010

<sup>a</sup>For prostate cancer, only advanced cases were included.

<sup>b</sup>Adjusted for the same variables as in Table 2.

<sup>c</sup>Tests for trend were conducted using the median value of each category as a continuous variable.

**eTable 6. Status, Duration of Regular Aspirin Use, and Time Since Last Use and Risk for Cancer**

|                                        | Never regular user | Former regular user |                     |                     | Current regular user |                   |
|----------------------------------------|--------------------|---------------------|---------------------|---------------------|----------------------|-------------------|
|                                        |                    | ≤10 y               | > 10 y              |                     | ≤10 y                | >10 y             |
|                                        |                    |                     | >5 y since last use | ≤5 y since last use |                      |                   |
| <b>Total cancer<sup>a</sup></b>        |                    |                     |                     |                     |                      |                   |
| <b>Women</b>                           |                    |                     |                     |                     |                      |                   |
| Cases, No. (N=20335)                   | 6307               | 3236                | 608                 | 1280                | 3853                 | 5051              |
| Person-years                           | 861597             | 334672              | 60238               | 139117              | 413703               | 512285            |
| Age-adjusted RR (95% CI)               | 1[Reference]       | 1.05 (1.01, 1.10)   | 1.03 (0.94, 1.12)   | 1.02 (0.96, 1.09)   | 1.04 (1.00, 1.09)    | 1.00 (0.96, 1.04) |
| Multivariable RR (95% CI) <sup>b</sup> | 1[Reference]       | 1.03 (0.98, 1.07)   | 0.98 (0.90, 1.07)   | 0.99 (0.93, 1.05)   | 1.01 (0.97, 1.05)    | 0.97 (0.93, 1.01) |
| <b>Men</b>                             |                    |                     |                     |                     |                      |                   |
| Cases, No. (N=7571)                    | 2432               | 1129                | 27                  | 184                 | 2386                 | 1413              |
| Person-years                           | 343395             | 120438              | 1657                | 17429               | 288293               | 134886            |
| Age-adjusted RR (95% CI)               | 1[Reference]       | 1.00 (0.93, 1.07)   | 1.44 (0.98, 2.13)   | 0.90 (0.77, 1.05)   | 0.93 (0.88, 0.99)    | 0.98 (0.91, 1.06) |
| Multivariable RR (95% CI) <sup>b</sup> | 1[Reference]       | 0.97 (0.90, 1.05)   | 1.34 (0.91, 1.98)   | 0.85 (0.73, 1.00)   | 0.90 (0.85, 0.96)    | 0.93 (0.86, 1.01) |
| <b>Combined</b>                        |                    |                     |                     |                     |                      |                   |
| Cases, No. (N=27906)                   | 8739               | 4365                | 635                 | 1464                | 6239                 | 6464              |
| Person-years                           | 1204992            | 455110              | 61895               | 156546              | 701996               | 647171            |
| Age-adjusted RR (95% CI)               | 1[Reference]       | 1.04 (1.00, 1.08)   | 1.03 (0.95, 1.12)   | 1.00 (0.95, 1.06)   | 1.00 (0.97, 1.04)    | 0.99 (0.96, 1.03) |
| Multivariable RR (95% CI) <sup>b</sup> | 1[Reference]       | 1.01 (0.98, 1.05)   | 0.98 (0.90, 1.07)   | 0.96 (0.91, 1.02)   | 0.97 (0.94, 1.01)    | 0.96 (0.93, 0.99) |
| <b>GI cancer</b>                       |                    |                     |                     |                     |                      |                   |
| <b>Women</b>                           |                    |                     |                     |                     |                      |                   |
| Cases, No. (N=2366)                    | 840                | 392                 | 62                  | 116                 | 442                  | 514               |
| Age-adjusted RR (95% CI)               | 1[Reference]       | 0.96 (0.85, 1.08)   | 0.86 (0.66, 1.12)   | 0.72 (0.59, 0.87)   | 0.88 (0.78, 0.99)    | 0.78 (0.69, 0.87) |
| Multivariable RR (95% CI) <sup>b</sup> | 1[Reference]       | 0.96 (0.85, 1.08)   | 0.86 (0.66, 1.12)   | 0.72 (0.59, 0.88)   | 0.86 (0.77, 0.97)    | 0.77 (0.69, 0.87) |
| <b>Men</b>                             |                    |                     |                     |                     |                      |                   |
| Cases, No. (N=1917)                    | 655                | 315                 | 5                   | 40                  | 581                  | 321               |
| Age-adjusted RR (95% CI)               | 1[Reference]       | 1.01 (0.87, 1.16)   | 0.96 (0.39, 2.36)   | 0.70 (0.51, 0.98)   | 0.83 (0.74, 0.93)    | 0.79 (0.68, 0.91) |
| Multivariable RR (95% CI) <sup>b</sup> | 1[Reference]       | 1.03 (0.89, 1.19)   | 0.98 (0.40, 2.41)   | 0.73 (0.52, 1.02)   | 0.82 (0.73, 0.93)    | 0.80 (0.68, 0.93) |
| <b>Combined</b>                        |                    |                     |                     |                     |                      |                   |
| Cases, No. (N=4283)                    | 1495               | 707                 | 67                  | 156                 | 1023                 | 835               |
| Age-adjusted RR (95% CI)               | 1[Reference]       | 0.98 (0.89, 1.07)   | 0.87 (0.67, 1.11)   | 0.71 (0.60, 0.84)   | 0.85 (0.78, 0.92)    | 0.78 (0.71, 0.85) |
| Multivariable RR (95% CI) <sup>b</sup> | 1[Reference]       | 0.99 (0.90, 1.08)   | 0.86 (0.67, 1.11)   | 0.72 (0.60, 0.85)   | 0.84 (0.77, 0.91)    | 0.78 (0.71, 0.86) |
| <b>Non-GI cancer</b>                   |                    |                     |                     |                     |                      |                   |
| <b>Women</b>                           |                    |                     |                     |                     |                      |                   |
| Cases, No. (N=17969)                   | 5467               | 2844                | 546                 | 1164                | 3411                 | 4537              |
| Age-adjusted RR (95% CI)               | 1[Reference]       | 1.07 (1.02, 1.12)   | 1.05 (0.96, 1.15)   | 1.07 (1.01, 1.14)   | 1.07 (1.02, 1.12)    | 1.04 (1.00, 1.08) |
| Multivariable RR (95% CI) <sup>b</sup> | 1[Reference]       | 1.04 (0.99, 1.09)   | 1.00 (0.91, 1.09)   | 1.02 (0.96, 1.09)   | 1.03 (0.99, 1.08)    | 1.00 (0.96, 1.04) |
| <b>Men</b>                             |                    |                     |                     |                     |                      |                   |
| Cases, No. (N=5654)                    | 1777               | 814                 | 22                  | 144                 | 1805                 | 1092              |
| Age-adjusted RR (95% CI)               | 1[Reference]       | 0.99 (0.91, 1.08)   | 1.62 (1.05, 2.50)   | 0.97 (0.82, 1.16)   | 0.97 (0.91, 1.04)    | 1.06 (0.97, 1.15) |
| Multivariable RR (95% CI) <sup>b</sup> | 1[Reference]       | 0.95 (0.87, 1.04)   | 1.46 (0.94, 2.25)   | 0.90 (0.75, 1.08)   | 0.93 (0.87, 1.00)    | 0.98 (0.90, 1.07) |
| <b>Combined</b>                        |                    |                     |                     |                     |                      |                   |

|                                        |              |                   |                   |                   |                   |                   |
|----------------------------------------|--------------|-------------------|-------------------|-------------------|-------------------|-------------------|
| Cases, No. (N=23623)                   | 7244         | 3658              | 568               | 1308              | 5216              | 5629              |
| Age-adjusted RR (95% CI)               | 1[Reference] | 1.05 (1.01, 1.09) | 1.06 (0.97, 1.15) | 1.05 (0.99, 1.12) | 1.04 (1.00, 1.08) | 1.04 (1.00, 1.08) |
| Multivariable RR (95% CI) <sup>b</sup> | 1[Reference] | 1.02 (0.98, 1.06) | 1.00 (0.92, 1.10) | 1.01 (0.95, 1.07) | 1.00 (0.97, 1.04) | 0.99 (0.96, 1.03) |

NHS 1986-2012, HPFS 1998-2010

<sup>a</sup>For prostate cancer, only advanced cases were included.

<sup>b</sup>Adjusted for the same variables as in Table 2.

<sup>c</sup>Never regular user was defined as nonregular user (<2 times/wk) on the most recent questionnaire and on all previous questionnaires.

**eTable 7. Joint Analysis of Dose and Duration of Regular Aspirin Use and Risk for Cancer**

|                                   | Dose (tablets/wk)            | Years of Any Aspirin Use |                           |                           |                          |                           |
|-----------------------------------|------------------------------|--------------------------|---------------------------|---------------------------|--------------------------|---------------------------|
|                                   |                              | 0                        | 1-5                       | 6-10                      | 11-15                    | ≥16                       |
| <b>Total cancer<sup>a,b</sup></b> |                              |                          |                           |                           |                          |                           |
| <b>Women</b>                      | 0                            | 6307<br>1[Reference]     |                           |                           |                          |                           |
|                                   | 0.5-1.5                      |                          | 263<br>1.07 (0.94, 1.21)  | 344<br>1.15 (1.03, 1.29)  | 154<br>1.02 (0.87, 1.20) | 381<br>0.94 (0.85, 1.05)  |
|                                   | 2-5                          |                          | 785<br>1.00 (0.92, 1.08)  | 920<br>0.99 (0.93, 1.07)  | 525<br>1.02 (0.93, 1.11) | 1468<br>0.94 (0.88, 1.00) |
|                                   | ≥6                           |                          | 541<br>1.00 (0.92, 1.10)  | 743<br>0.97 (0.90, 1.05)  | 469<br>1.04 (0.94, 1.14) | 1458<br>0.98 (0.92, 1.04) |
|                                   |                              |                          | 2432<br>1[Reference]      |                           |                          |                           |
| <b>Men</b>                        | 0                            | 2432<br>1[Reference]     |                           |                           |                          |                           |
|                                   | 0.5-1.5                      |                          | 112<br>0.91 (0.75, 1.11)  | 188<br>0.93 (0.80, 1.09)  | 110<br>0.87 (0.71, 1.07) | 161<br>1.01 (0.85, 1.20)  |
|                                   | 2-5                          |                          | 217<br>0.98 (0.85, 1.14)  | 420<br>0.93 (0.83, 1.04)  | 261<br>0.94 (0.82, 1.08) | 359<br>0.99 (0.87, 1.12)  |
|                                   | ≥6                           |                          | 128<br>0.85 (0.71, 1.03)  | 330<br>0.88 (0.78, 1.00)  | 242<br>0.88 (0.76, 1.01) | 310<br>0.92 (0.81, 1.05)  |
|                                   |                              |                          | 8739<br>1[Reference]      |                           |                          |                           |
| <b>Combined</b>                   | 0                            | 8739<br>1[Reference]     |                           |                           |                          |                           |
|                                   | 0.5-1.5                      |                          | 375<br>1.02 (0.92, 1.14)  | 532<br>1.08 (0.98, 1.18)  | 264<br>0.97 (0.85, 1.10) | 542<br>0.97 (0.88, 1.06)  |
|                                   | 2-5                          |                          | 1002<br>1.00 (0.93, 1.07) | 1340<br>0.98 (0.92, 1.04) | 786<br>1.00 (0.93, 1.08) | 1827<br>0.95 (0.90, 1.00) |
|                                   | ≥6                           |                          | 669<br>0.98 (0.90, 1.06)  | 1073<br>0.95 (0.89, 1.02) | 711<br>0.99 (0.91, 1.07) | 1768<br>0.97 (0.92, 1.02) |
|                                   | <b>GI cancer<sup>b</sup></b> |                          |                           |                           |                          |                           |
| <b>Women</b>                      | 0                            | 840<br>1[Reference]      |                           |                           |                          |                           |
|                                   | 0.5-1.5                      |                          | 25<br>0.78 (0.52, 1.17)   | 37<br>0.96 (0.68, 1.34)   | 15<br>0.75 (0.45, 1.26)  | 37<br>0.74 (0.53, 1.04)   |
|                                   | 2-5                          |                          | 84<br>0.81 (0.64, 1.02)   | 101<br>0.88 (0.71, 1.09)  | 50<br>0.75 (0.56, 1.01)  | 152<br>0.82 (0.68, 0.98)  |
|                                   | ≥6                           |                          | 67<br>0.86 (0.67, 1.11)   | 91<br>0.86 (0.69, 1.07)   | 54<br>0.84 (0.63, 1.11)  | 137<br>0.70 (0.58, 0.85)  |
|                                   | <b>Men</b>                   | 0                        | 655<br>1[Reference]       |                           |                          |                           |
| 0.5-1.5                           |                              |                          | 31<br>1.03 (0.71, 1.51)   | 45<br>0.93 (0.67, 1.28)   | 23<br>0.69 (0.45, 1.08)  | 33<br>0.77 (0.53, 1.12)   |
| 2-5                               |                              |                          | 60<br>1.11 (0.83, 1.47)   | 86<br>0.74 (0.58, 0.94)   | 61<br>0.86 (0.65, 1.14)  | 86<br>0.93 (0.71, 1.20)   |
| ≥6                                |                              |                          | 31<br>1.11 (0.83, 1.47)   | 86<br>0.74 (0.58, 0.94)   | 53<br>0.86 (0.65, 1.14)  | 76<br>0.93 (0.71, 1.20)   |

|                 |         |              |                   |                   |                   |                   |
|-----------------|---------|--------------|-------------------|-------------------|-------------------|-------------------|
| <b>Combined</b> | 0       | 1495         | 0.82 (0.56, 1.21) | 0.88 (0.69, 1.12) | 0.72 (0.53, 0.97) | 0.85 (0.65, 1.10) |
|                 |         | 1[Reference] |                   |                   |                   |                   |
|                 | 0.5-1.5 | 56           | 0.90 (0.68, 1.18) | 0.93 (0.74, 1.18) | 0.71 (0.51, 0.99) | 0.75 (0.58, 0.96) |
|                 | 2-5     | 144          | 0.91 (0.76, 1.09) | 0.80 (0.68, 0.94) | 0.80 (0.66, 0.98) | 0.85 (0.73, 0.99) |
|                 | ≥6      | 98           | 0.85 (0.69, 1.04) | 0.86 (0.73, 1.02) | 0.77 (0.63, 0.94) | 0.75 (0.64, 0.87) |

NHS 1980-2012, HPFS 1992-2010

<sup>a</sup>For prostate cancer, only advanced cases were included.

<sup>b</sup>Adjusted for the same variables as in Table 2.

**eTable8. Population-Attributable Risk (PAR) of Regular Aspirin Use**

|                                              | Cases, No. | PAR (95% CI), %    |
|----------------------------------------------|------------|--------------------|
| <b>Total cancer</b>                          |            |                    |
| <i>Women</i>                                 | 20414      | 1.1 (0.0, 3.7)     |
| <i>Men</i>                                   | 7571       | 3.1 (1.0, 5.3)     |
| <i>Combined</i>                              | 27985      | 1.8 (0.6, 3.1)     |
| <b>GI cancer</b>                             |            |                    |
| <i>Women</i>                                 | 2376       | 7.4 (3.3, 11.5)    |
| <i>Men</i>                                   | 1917       | 8.6 (4.8, 12.4)    |
| <i>Combined</i>                              | 4293       | 8.0 (5.4, 10.6)    |
| <b>Colorectal cancer</b>                     |            |                    |
| <i>Women</i>                                 | 1728       | 9.4 (4.8, 14.1)    |
| <i>Men</i>                                   | 1167       | 12.6 (8.0, 17.1)   |
| <i>Combined</i>                              | 2895       | 10.8 (7.8, 13.7)   |
| <i>Sigmoidoscopy/colonoscopy<sup>a</sup></i> |            |                    |
| <i>Yes</i>                                   | 1099       | 8.5 (3.9, 12.9)    |
| <i>No</i>                                    | 1120       | 17.0 (12.8, 21.1 ) |

<sup>a</sup>Restricted to age 50 and above.

**eFigure.** Stratified Analysis of Regular Aspirin Use and Risk for Gastrointestinal and Colorectal Cancer

**A.** Gastrointestinal cancer

**B.** Colorectal cancer

A.

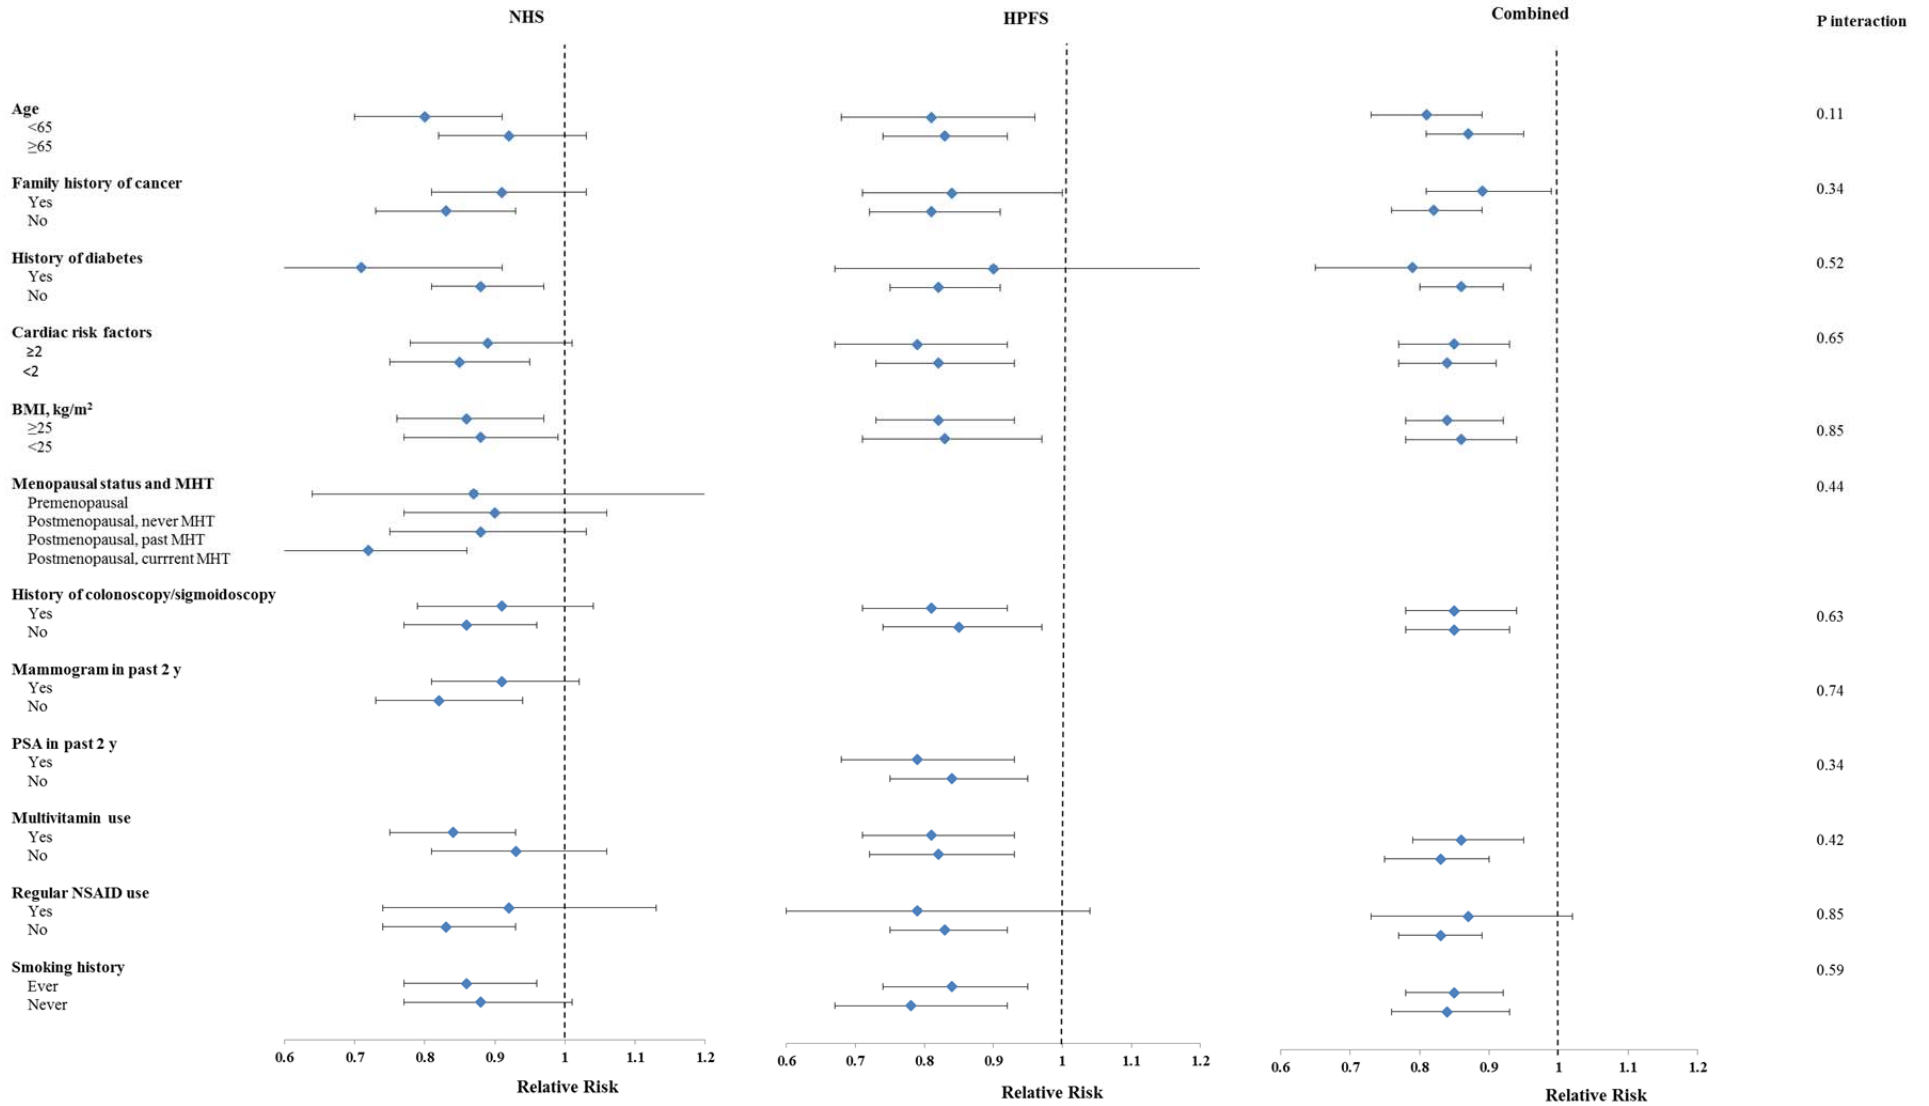



B.

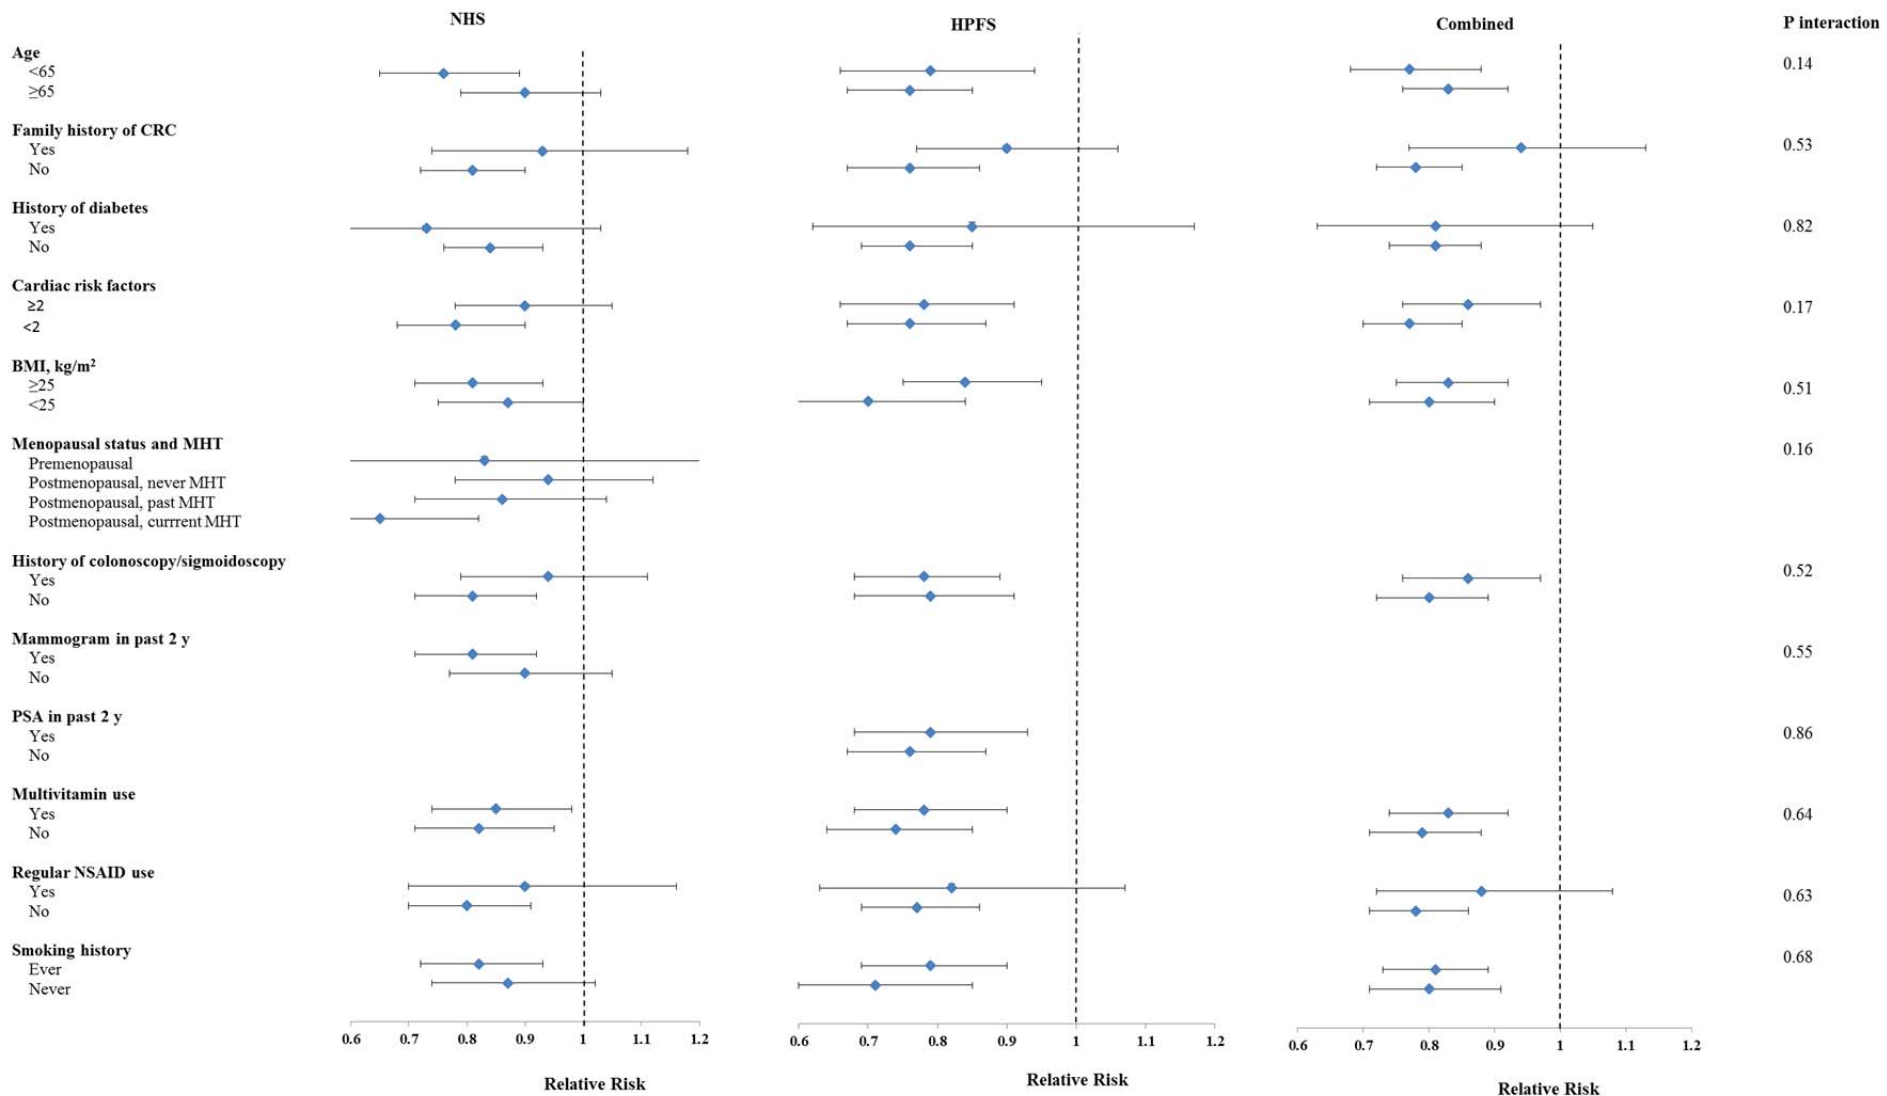

Supplement: jamaoncol-e156396-s001.pdf [file jamaoncol-e156396-s001.pdf]
